# Supplementary material for: Efficient solution-processed red all-fluorescent organic light-emitting diodes employing thermally activated delayed fluorescence materials as assistant hosts: molecular design strategy and exciton dynamic analysis
Source: Royal Society of Chemistry journal article supplement (doi:10.1039/c7tc01164d), 2017-01-01
Supplement: c7tc01164d1.pdf [file c7tc01164d1.pdf]

## Supporting Information

### **Efficient Solution-Processed Red All-Fluorescent Organic Light-Emitting Diodes Employing Thermally Activated Delayed Fluorescence Materials as Assistant Hosts: Molecular Design Strategy and Exciton Dynamic Analysis**

Dongjun Chen,<sup>†</sup> Xinyi Cai,<sup>†</sup> Xianglong Li, Zuozheng He, Chengsong Cai, Dongcheng Chen and Shijian Su\*

State Key Laboratory of Luminescent Materials and Devices and Institute of Polymer Optoelectronic Materials and Devices, South China University of Technology, Guangzhou 510640, China

<sup>†</sup>These two authors contributed equally to this work.

\*Corresponding author. E-mail: [mssjsu@scut.edu.cn](mailto:mssjsu@scut.edu.cn)

## 1. Material information of DC-TC and DC-ACR.

**Table S1.** Thermal, electrochemical and photo-physical properties of DC-TC and DC-ACR<sup>1</sup>

| Compound | T <sub>d</sub> /T <sub>g</sub> (°C) <sup>a,b</sup> | λ <sub>abs</sub> (nm) <sup>c</sup> | λ <sub>PL</sub> (nm) <sup>c</sup> | PLQY (%) <sup>c</sup> | IP/EA (eV) <sup>d</sup> | S <sub>1</sub> /T <sub>1</sub> /ΔE <sub>ST</sub> (eV) <sup>e</sup> |
|----------|----------------------------------------------------|------------------------------------|-----------------------------------|-----------------------|-------------------------|--------------------------------------------------------------------|
| DC-TC    | 413/85                                             | 389                                | 518                               | 22.1                  | -5.58/-2.99             | 2.75/2.61/0.14                                                     |
| DC-ACR   | 387/98                                             | 411                                | 532                               | 8.0                   | -5.32/-2.79             | 2.48/2.47/0.01                                                     |

<sup>a</sup> decomposition temperature (5% weight loss); <sup>b</sup> glass transition temperature; <sup>c</sup> PLQY of 15 wt% investigated molecules doped into CBP in N<sub>2</sub> atmosphere; <sup>d</sup> IP measured by cyclic voltammetry and EA calculated by IP minus optical gap approximated by absorption edge in toluene; <sup>e</sup> The values of the S<sub>1</sub>, T<sub>1</sub> and ΔE<sub>ST</sub> evaluated in toluene (DC-ACR in n-hexane) at 77K, respectively.

## 2. Surface morphology of the co-doped films.

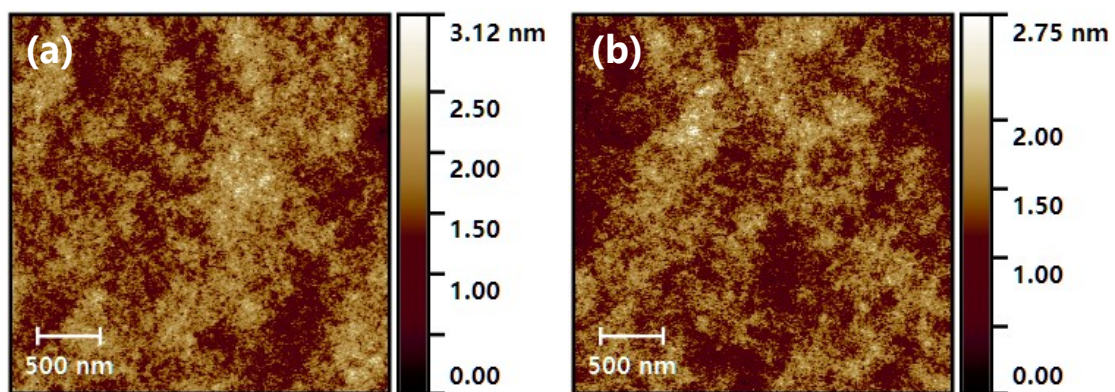

**Figure S1.** AFM images of 40-nm thin films of 2 wt% DBP:15 wt% DC-TC:CBP (a) and 2 wt% DBP:15 wt% DC-ACR:CBP (b) spin-coated on PEDOT:PSS coated ITO substrates. The films were prepared using chlorobenzene as the solvent and was then annealed at 100 °C for 10 min. The RMS roughness of 2 wt% DBP:15 wt% DC-TC:CBP and 2 wt% DBP:15 wt% DC-ACR:CBP films was 0.292 nm and 0.327 nm, respectively.

### 3. The PL characteristics and rate constants of TADF molecules.

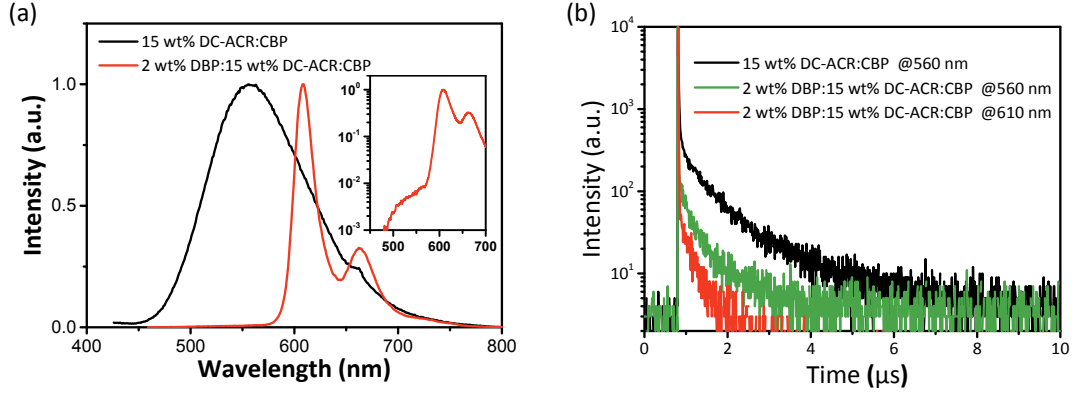

**Figure S2.** (a) The PL spectral of the co-doped films of 15 wt% DC-ACR:CBP (black line) and 2 wt% DBP:15 wt% DC-ACR:CBP (red line) in the air at room temperature. Inset shows the PL spectrum in logarithm. (b) Time-resolved fluorescence decay curves for the co-doped films of 15 wt% DC-ACR:CBP and 2 wt% DBP:15 wt% DC-ACR:CBP in a  $N_2$  atmosphere.

**Table S2.** The PL efficiencies and life-times of the PL decay curves of the co-doped films.

| Films                 | $\Phi$<br>(%) | $\Phi_F$<br>(%) | $\Phi_{TADF}$<br>(%) | $\tau_p$<br>(ns) | $\tau_d$<br>( $\mu$ s) |
|-----------------------|---------------|-----------------|----------------------|------------------|------------------------|
| 15%DC-TC:CBP          | 22.1          | 12.3            | 9.7                  | 16.72            | 14.29                  |
| 2% DBP:15% DC-TC:CBP  | 69.2          | 55.1            | 14.1                 | 5.37             | 1.34                   |
| 15% DC-ACR:CBP        | 8.0           | 6.6             | 6.6                  | 10.85            | 0.78                   |
| 2% DBP:15% DC-ACR:CBP | 62.1          | 48.7            | 13.4                 | 5.56             | 0.37                   |

With the measured PL efficiencies and decay times, the rate constants for the 15 wt% DC-TC:CBP and 15 wt% DC-ACR:CBP co-doped films were calculated using the equations described as follow:<sup>2-6</sup>

$$k_p = \frac{1}{\tau_p} \quad (1)$$

$$k_d = \frac{1}{\tau_d} \quad (2)$$

$$k_r^S = \Phi_F k_p \quad (3)$$

$$k_{nr}^S = \left( \frac{\Phi_F}{\Phi} - \Phi_F \right) k_p \quad (4)$$

$$k_{nr}^T = k_d - \Phi_F k_{RISC} \quad (5)$$

$$k_{ISC} = \left( 1 - \frac{\Phi_F}{\Phi} \right) k_p \quad (6)$$

$$k_{RISC} = \frac{k_p k_d \Phi_{TADF}}{k_{ISC} \Phi_F} \quad (7)$$

where  $\tau_p$  is the transient decay time of the prompt component,  $\tau_d$  is the transient decay time of the delayed component, and  $\Phi_F$  and  $\Phi_{TADF}$  are the prompt and delayed components of the PL quantum efficiency, respectively.

For the DC-TC:CBP film,  $k_{p,D}$  can be described as

$$k_{p,D} = k_r^S + k_{ISC} + k_{nr}^S \quad (8)$$

For the DBP:DC-TC:CBP co-doped films,  $k_{p,DA}$  can be described as

$$k_{p,DA} = k_r^S + k_{ISC} + k_{nr}^S + k_{ET} \quad (9)$$

where  $k_{ET}$  is the rate constant of the Förster resonance energy transfer.

Thus,  $k_{ET}$  can be describe as<sup>7</sup>

$$k_{ET} = k_{p,DA} - k_{p,D} = \frac{1}{\tau_{DA}} - \frac{1}{\tau_D} \quad (10)$$

where  $\tau_{DA}$  is the prompt fluorescent lifetime of the film with DBP and  $\tau_D$  is the prompt fluorescent lifetime of the film without DBP.

#### 4. Device Fabrication and Measurements

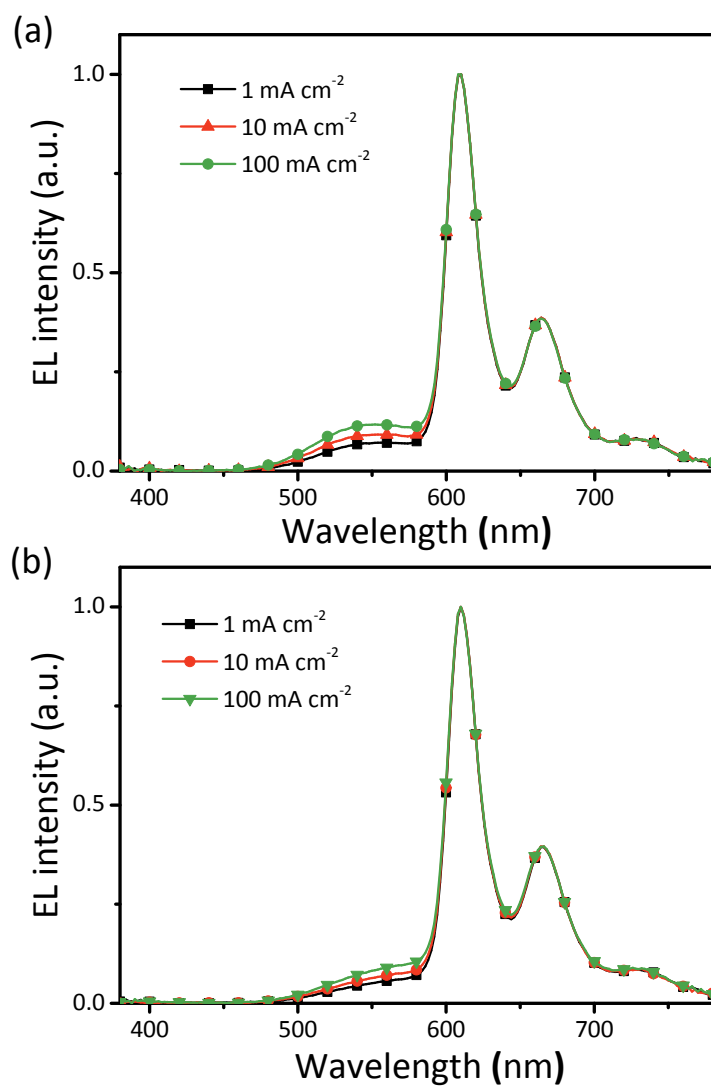

**Figure S3.** Normalized EL spectra of the devices using 2 wt% DBP:15 wt% DC-TC:CBP (a) or 2 wt% DBP:15 wt% DC-ACR:CBP (b) as EML under the current density ranging from 1 mA/m<sup>2</sup> to 100 mA/m<sup>2</sup>.

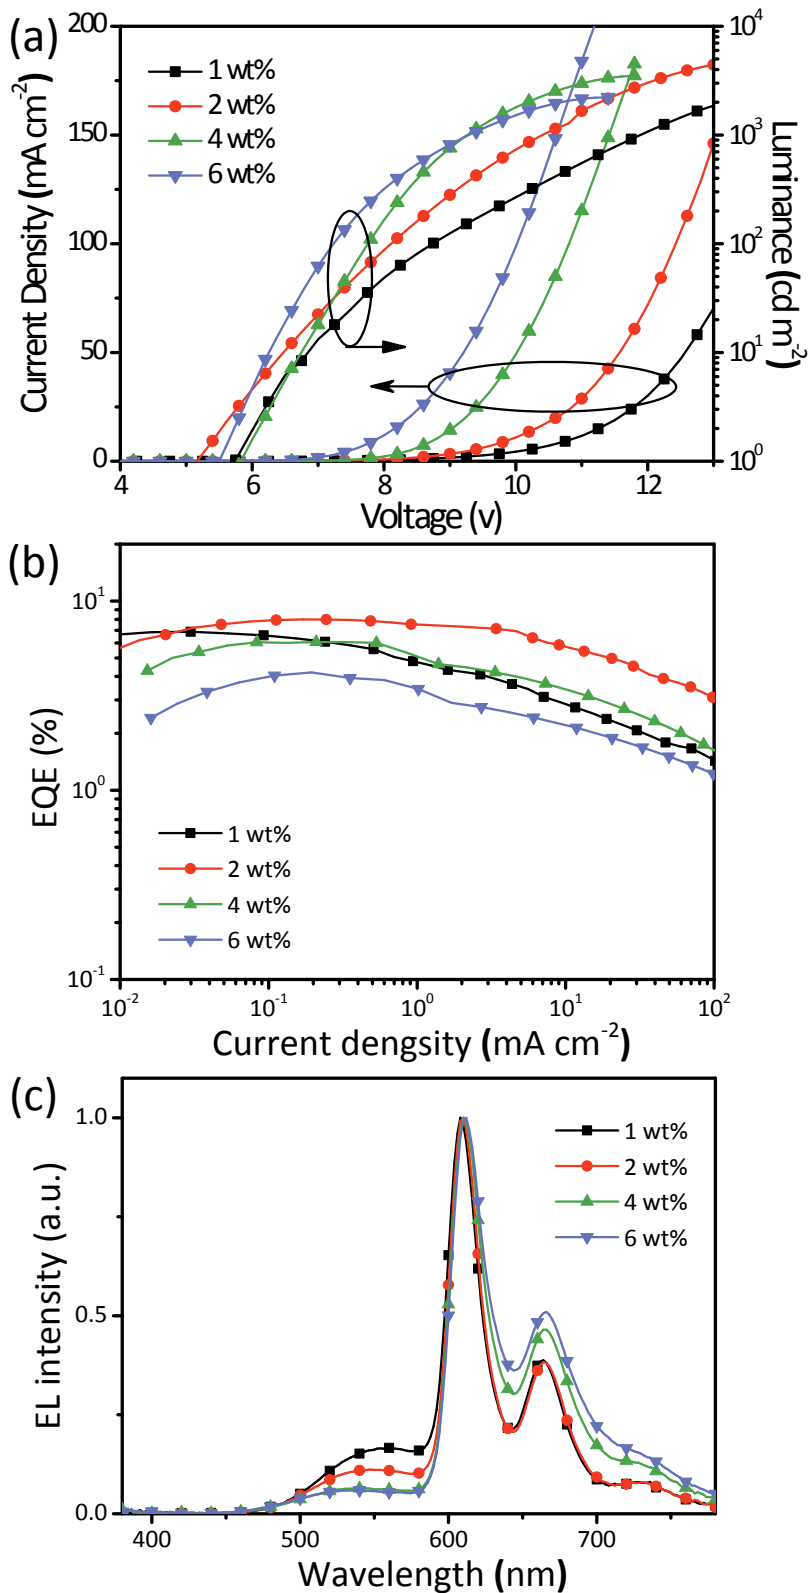

**Figure S4.** (a) Luminance-current density-voltage, (b) EQE-current density and (c) normalized EL spectra of the TAF-OLEDs based on DBP as an emitter at various doping concentrations in a structure of ITO/PEDOT:PSS (40 nm)/x wt% DBP:15 wt% DC-TC:CBP (40 nm)/TmPyPB (55 nm)/LiF (1 nm)/Al (100 nm).

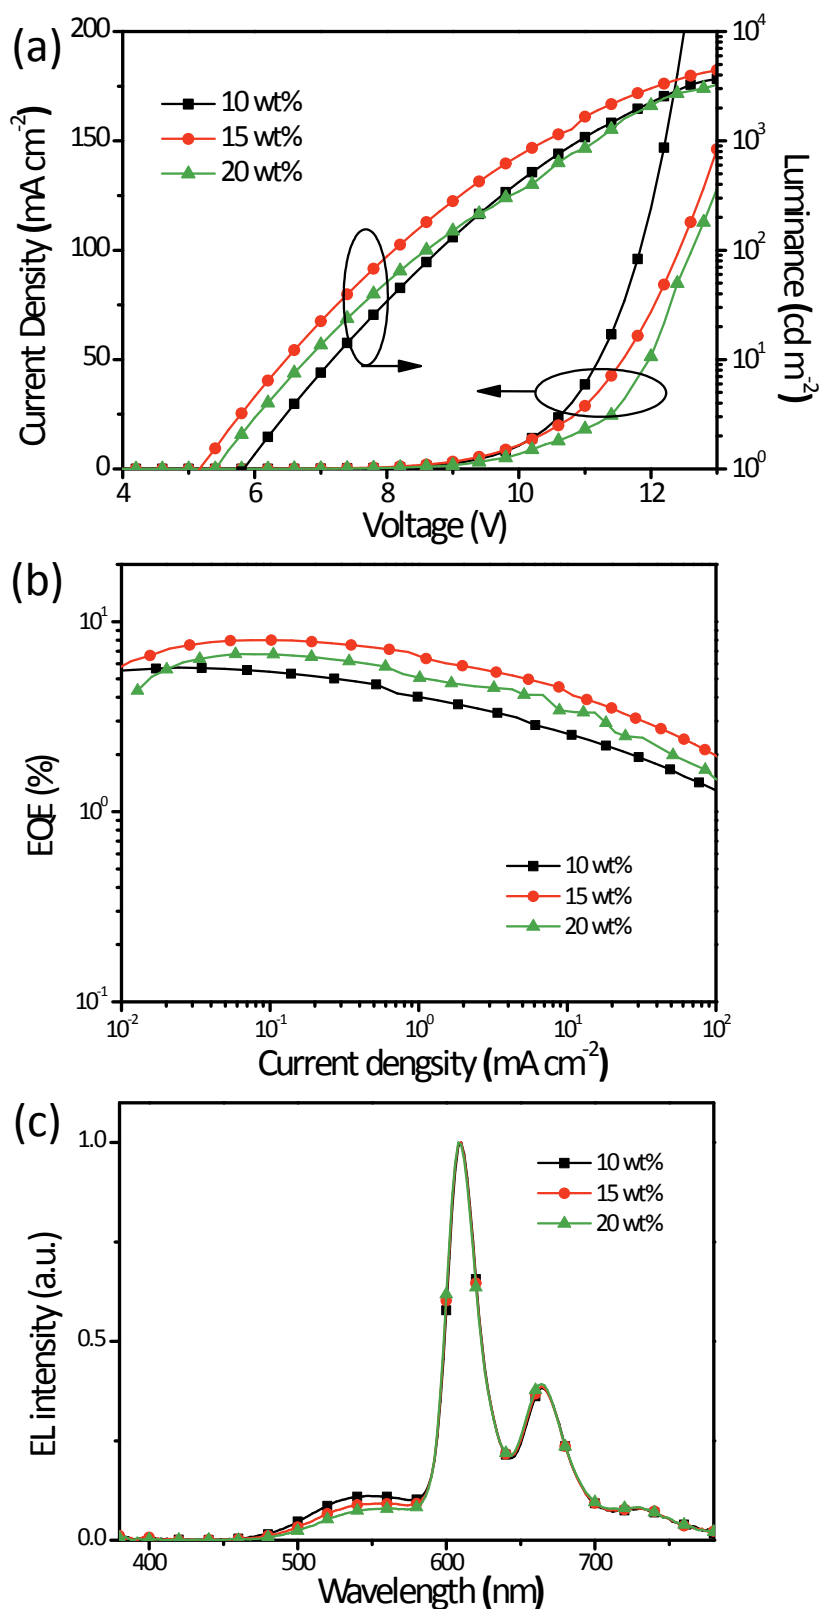

**Figure S5.** (a) Luminance-current density-voltage, (b) EQE-current density and (c) normalized EL spectra of the TAF-OLEDs based on DC-TC as an assistant dopant at various doping concentrations in a structure of ITO/PEDOT:PSS (40 nm)/2 wt% DBP:x wt% DC-TC:CBP (40 nm)/TmPyPB (55 nm)/LiF (1 nm)/Al (100 nm).



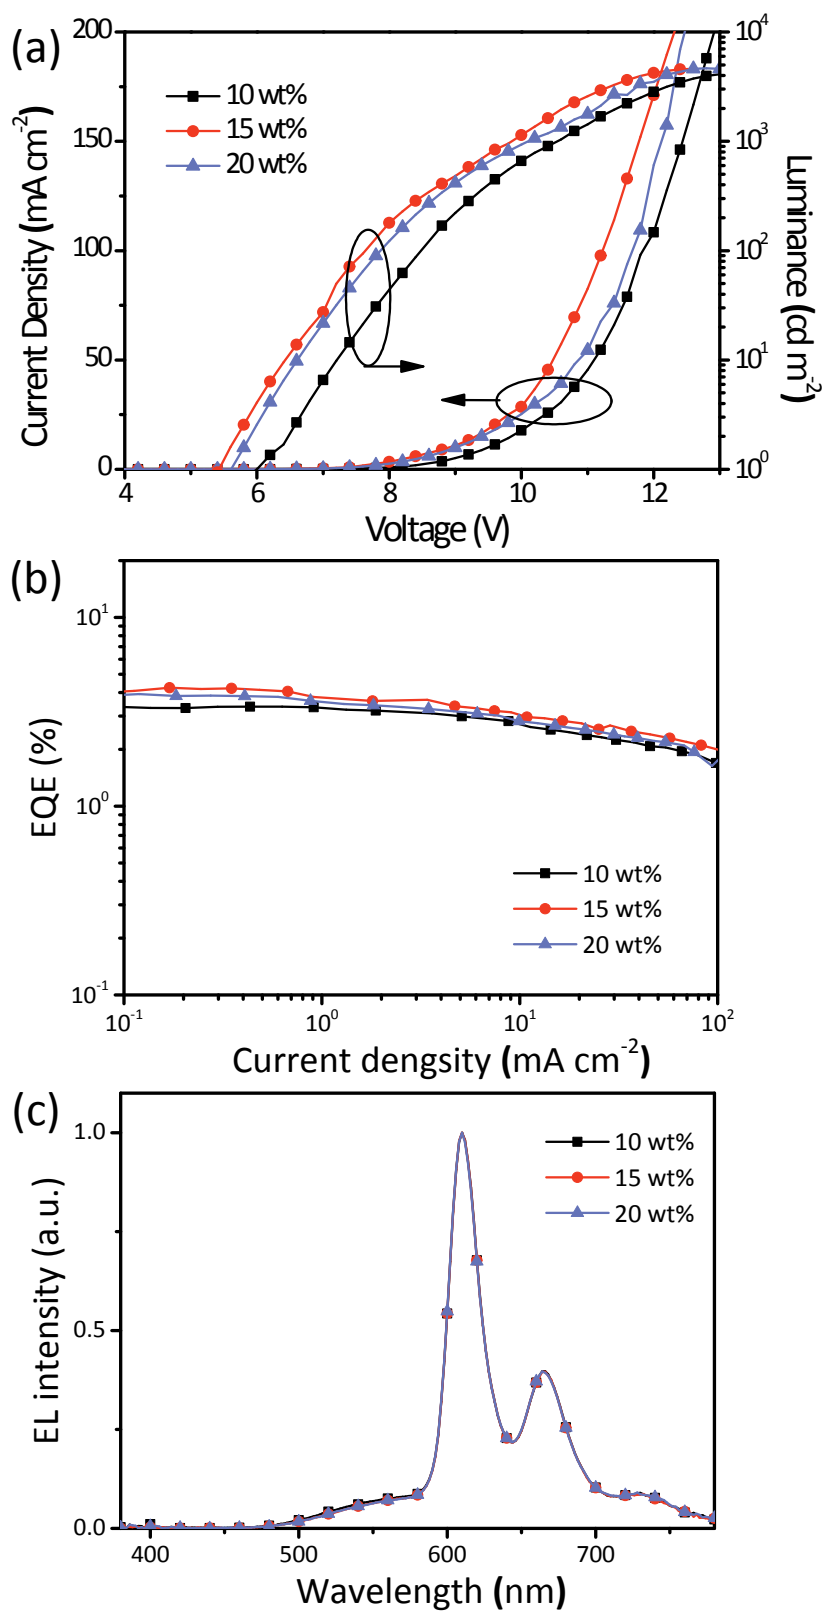

**Figure S6.** (a) Luminance-current density-voltage, (b) EQE-current density and (c) normalized EL spectra of the TAF-OLEDs based on DC-ACR as an assistant dopant at various doping concentrations in a structure of ITO/PEDOT:PSS (40 nm)/2 wt% DBP:x wt% DC-ACR:CBP (40 nm)/TmPyPB (55 nm)/LiF (1 nm)/Al (100 nm).

## 5. Exciton dynamics in DC-ACR based TAF-OLED

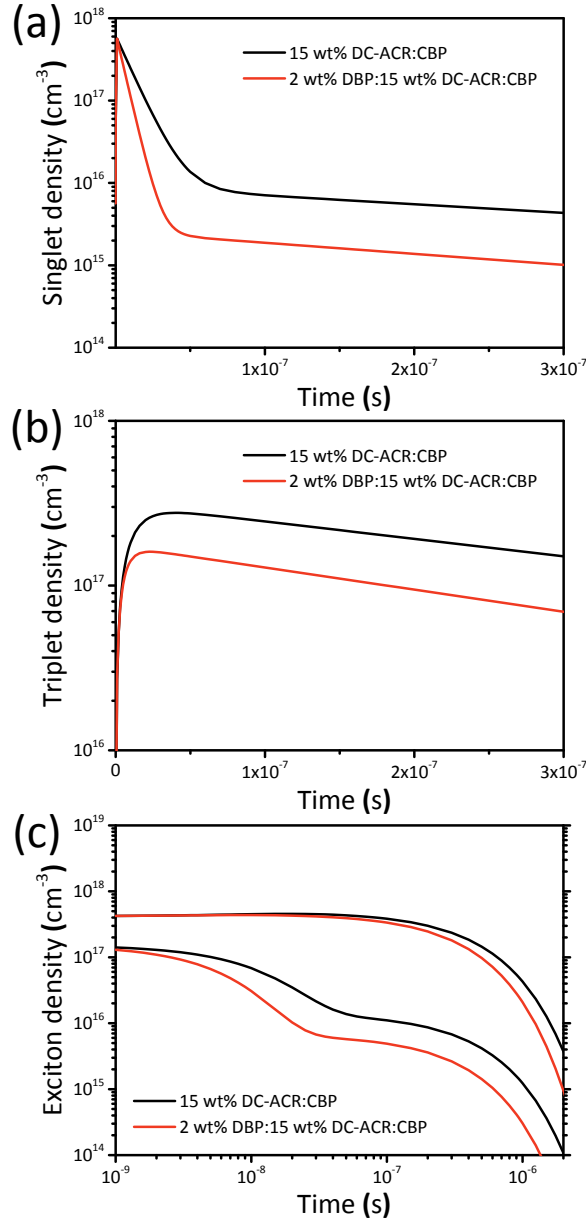

**Figure S7.** Dependence of calculated singlet density (a) and triplet density (b) in a 15 wt% DC-ACR:CBP co-coped film as a function of time with ( $k_{ET} = 8.8 \times 10^7 \text{ s}^{-1}$ , red lines) or without ( $k_{ET} = 0 \text{ s}^{-1}$ , black lines) Förster energy transfer. The exciton density is calculated using Equation (5) and (6) with  $k_r^S = 3.7 \times 10^6 \text{ s}^{-1}$ ,  $k_{ISC} = 4.6 \times 10^7 \text{ s}^{-1}$ ,  $k_{RISC} = 2.6 \times 10^5 \text{ s}^{-1}$ ,  $k_{nr}^S = 4.3 \times 10^7 \text{ s}^{-1}$  and  $k_{nr}^T = 1.2 \times 10^6 \text{ s}^{-1}$ . (c) The calculated singlet and triplet exciton densities in a 15 wt% DC-ACR:CBP co-coped film under electrical excitation as a function of time with or without Förster energy transfer using Equation (8) and (9).

## Reference

1. X. Cai, X. Li, G. Xie, Z. He, K. Gao, K. Liu, D. Chen, Y. Cao and S.-J. Su, *Chem. Sci.*, 2016, **7**, 4264-4275.
2. Y. Tao, K. Yuan, T. Chen, P. Xu, H. Li, R. Chen, C. Zheng, L. Zhang and W. Huang, *Adv. Mater.*, 2014, **26**, 7931-7958.
3. Q. Zhang, H. Kuwabara, W. J. Potscavage, Jr., S. Huang, Y. Hatae, T. Shibata and C. Adachi, *J. Am. Chem. Soc.*, 2014, **136**, 18070-18081.
4. H. Uoyama, K. Goushi, K. Shizu, H. Nomura and C. Adachi, *Nature*, 2012, **492**, 234-238.
5. K. Goushi, K. Yoshida, K. Sato and C. Adachi, *Nat. Phot.*, 2012, **6**, 253-258.
6. H. Tanaka, K. Shizu, J. Lee and C. Adachi, *J. Phys. Chem. C*, 2015, **119**, 2948-2955.
7. C. Li, L. Duan, D. Zhang and Y. Qiu, *ACS Appl. Mater. Interfaces*, 2015, **7**, 15154-15159.
